# Supplementary material
Source: publisher figshare collection journal article supplement (https://gsajournals.figshare.com/ndownloader/files/31138501)
Supplement: Supplementary file 1 [file 31138501]

## Sheet: Key
Supplementary Table 2: Relative expression of 26 BGCs from Af293, CEA17, ∆crzA_Af293 and ∆crzA_CEA17 strains exposed or not to LD and HD of CSP
BGC number	BGC number according to Bignell et al., 2016
Gene name	gene name according to aspgd.org
Gene_ID	Gene identifier
Description and Metabolite if known	BGC product (if known)
Af293_LD_vs_Af293_C	Relative expression (log2 Fold-change) of Af293 genes exposed to LD of CSP comparing to Af293 not exposed to the drug
Af293_HD_vs_Af293_C	Relative expression (log2 Fold-change) of Af293 genes exposed to HD of CSP comparing to Af293 not exposed to the drug
CEA17_LD_vs_CEA17_C	Relative expression (log2 Fold-change) of CEA17 genes exposed to LD of CSP comparing to CEA17 not exposed to the drug
CEA17_HD_vs_CEA17_C	Relative expression (log2 Fold-change) of CEA17 genes exposed to HD of CSP comparing to CEA17 not exposed to the drug
dcrzAAf293_C_vs_Af293_C	Relative expression (log2 Fold-change) of ∆crzA_Af293 genes comparing to Af293
dcrzACEA17_C_vs_CEA17_C	Relative expression (log2 Fold-change) of ∆crzA_CEA17 genes comparing to CEA17

## Sheet: Supplementary Table 2
Supplementary Table 2: Relative expression of 26 BGCs from Af293, CEA17, ∆crzA_Af293 and ∆crzA_CEA17 strains exposed or not to LD and HD of CSP
BGC number / gene name	GENE_ID	Description and Metabolite if known	Contrast and Expression data (log2 fold-change)
BGC 1		Uncharacterized polyketide	Af293_LD_vs_Af293_C	Af293_HD_vs_Af293_C	CEA17_LD_vs_CEA17_C	CEA17_HD_vs_CEA17_C	dcrzAAf293_C_vs_Af293_C	dcrzACEA17_C_vs_CEA17_C
	Afu1g00970	MFS monocarboxylate transporter, putative	0.440461	1.26236	-0.221164	-0.135892	4.82671	-0.331985
	Afu1g00980	related to monocarboxylate transporter, putative	0.439982	0.300089	-0.221482	-0.136212	4.56091	0.346208
	Afu1g00990	short chain dehydrogenase dehydrogenases atsC	0.440549	2.73663	-0.221109	-0.135837	8.13464	1.45003
	Afu1g01000	oxidoreductase, 2OG-Fe(II) oxygenase family family	0.44051	1.26241	-0.221136	-0.135863	6.83158	-0.379013
	Afu1g01010	polyketide synthase	0.440141	0.300248	-0.221375	-0.136104	5.0683	-0.139493
BGC 2		Nidulanin
	Afu1g10270	pyridoxal reductase (AKR8)	-0.195048	-0.205834	-0.445924	-0.417396	0.461884	0.197486
	Afu1g10275	snoRNA	0.0769013	-0.496829	0.39687	0.0438466	-1.14567	-0.0544792
	Afu1g10280	C2H2 transcription factor smilar GliC	0.178843	0.352564	0.0812299	0.0779136	0.112314	-0.109642
	Afu1g10295	Merged from Afu1g10290 and Afu1g10300; only available through AspGD	0.102866	0.165581	0.152748	0.149475	-0.0388974	0.311035
	Afu1g10310	RNase L inhibitor, ATP binding site, ribosomal genesis	0.107025	0.0502665	0.117482	0.109313	-0.36364	1.77512
	Afu1g10320	formin binding protein (FNB3)	-0.0199337	-0.14359	-0.0165429	-0.182649	-0.0415519	1.40394
	Afu1g10330	subunit-like of the TRAPP Golgi trafficking complex	0.0288731	-0.105421	-0.450807	-0.3413	-0.415845	0.0225962
	Afu1g10340	pore forming activity peroxisome	0.0402479	0.0402268	0.233655	0.177062	-0.389438	-0.66145
	Afu1g10350	phosphoglycerate kinase, PgkA	-0.727956	-0.615448	-0.639363	-0.214401	0.0018931	-0.0698593
	Afu1g10360	mitochondrial outer membrane protein iml2	0.374352	0.393393	0.297452	0.328639	1.01712	1.67449
	Afu1g10370	MSF membrane transporter	0.22902	0.302759	0.336712	-0.0288698	-0.429254	-0.169152
	Afu1g10380	peptide synthetase, NRPS	-1.04247	-0.55498	0.0774625	-0.0195128	-2.15059	0.0457262
	Afu1g10390	ABC multidrug transporter, next gene maybe involved too	-1.25958	-1.31125	-0.449095	-0.783262	-1.59802	-0.303896
BGC 3		Ferricrocin
sidI	Afu1g17190	triacetylfusarinine C (TAFC) biosynthetic enoyl-CoA hydratase	-2.06784	-0.901182	-4.7916	-4.10402	1.10802	-0.209091
sidC	Afu1g17200	SidC NRPS	-0.533327	-0.133175	-0.814385	-0.547925	-0.224525	-0.211989
BGC 4		Fusarielin-like polyketide
	Afu1g17710	fungal Zn(2)-Cys(6) binuclear cluster domain protein	0.440127	0.300235	-0.221349	-0.136079	4.08393	0.106219
	Afu1g17720	oxidoreductase, putative	0.440349	0.300456	-0.221115	-0.135845	0.556185	3.49747
	Afu1g17723	aldose 1-epimerase family protein, putative	0.440267	0.300374	-0.221197	-0.135927	0.556102	0.501688
	Afu1g17725	cytochrome P450 oxidoreductase, putative	0.440228	0.300336	-0.221236	-0.135966	3.8375	0
	Afu1g17730	zinc binding enoyl reductase	0.440296	0.300404	-0.221168	-0.135897	1.52233	0.0359503
	Afu1g17740	polyketide synthase	0.440481	0.300586	-0.221156	-0.135884	6.74071	-1.34069
BGC 5		DHN Melanin
abr2	Afu2g17530	brown 2 abr2	1.0526	7.39309	-0.940028	-0.862527	7.02549	0.0402044
abr1	Afu2g17540	brown 1 abr1	2.40684	8.65409	1.24361	2.04651	9.11602	-0.378852
ayg1	Afu2g17550	yellowish-green 1 ayg1	-0.11045	5.77982	1.79132	0.862951	5.63606	3.48369
arp2	Afu2g17560	arp2 1,3,6,8-tetrahydroxynaphthalene reductase	1.06439	4.87443	1.90555	0.402824	4.98867	0.705286
arp1	Afu2g17580	scytalone dehydratase arp1	-0.981036	6.04444	1.94363	1.1815	5.06756	0.577547
alb1	Afu2g17600	polyketide synthetase pksP or alb1	0.361108	3.48309	0.697629	-0.341683	2.97461	1.55698
BGC 6		Fumigaclavine
easA (fgaOx3)	Afu2g17960	NADPH dehydrogenase Oye3	0.440446	6.87871	-0.221192	-0.13592	6.46674	0
easG (fgaFS)	Afu2g17970	Festuclavine dehydrogenase like	1.40215	7.77108	-0.221265	0.825798	7.11779	-1.01209
easK (fga450-1)	Afu2g17980	cytochrome P450 monooxygenase, putative	0.439974	4.44537	-0.22149	-0.13622	3.73771	-0.769113
easL (fgaPT1)	Afu2g17990	dimethylallyl tryptophan synthase-related	0.440458	6.39195	1.62959	2.29105	6.35969	-0.238296
easD (fgaDH)	Afu2g18000	oxidoreductase, short chain dehydrogenase/reductase family, putative	1.4022	7.2781	0.740563	2.29562	7.36083	2.5909
easM (fga450-2)	Afu2g18010	cytochrome P450 monooxygenase	0.424179	2.25936	2.24156	2.2846	3.48186	0.582855
easN (fgaAT)	Afu2g18020	Fumigaclavine B O-acetyltransferase	0.440494	4.90839	-0.221152	0.825914	5.65213	0.156343
easC (fgaCat)	Afu2g18030	catalase	1.3195	2.42829	-0.273138	-0.498202	1.9832	-0.378909
dmaW (fgaPT2)	Afu2g18040	dimethylallyl tryptophan synthase, putative	1.51949	2.65548	0.889785	0.448676	3.8762	-0.0402922
easE (fgaOx1)	Afu2g18050	oxidoreductase	1.13725	1.24057	-0.0594412	0.378815	1.52602	2.17024
easF (fgaMT)	Afu2g18060	4-dimethylallyltryptophan N-methyltransferase	-0.521322	5.79322	-0.221237	-0.135965	4.97556	0.570288
BGC 7		Uncharacterized polyketide
	Afu3g01400	ATP-binding cassette multidrug transporter	-0.50561	0.335818	0.0615301	0.098681	2.71246	-0.250151
	Afu3g01410	polyketide synthase	0.541674	1.00266	0.714914	0.728091	-0.493897	-0.0319286
	Afu3g01420	serine hydrolase	0.921703	0.956119	0.745108	1.02172	1.1893	-0.310786
	Afu3g01430	similar to Benzodiazepin receptor,Tryptophan-rich sensory protein	-1.2556	-1.27632	-0.594014	-1.15244	0.301599	0.0256379
	Afu3g01440	conserved hypothetical protein	0.815079	0.861427	1.29011	1.22003	0.915111	0.342512
	Afu3g01450	branched chain alpha-keto acid dehydrogenase E1 beta subunit, probably a second copy	0.727598	1.16537	0.0144348	0.90622	1.65023	0.34123
	Afu3g01460	salicylate hydroxylase	-0.547909	-0.0749013	0.447968	-0.624969	2.28504	0.107933
	Afu3g01470	hypothetical protein	3.89416	3.11856	2.9817	1.37255	3.62871	0.211161
	Afu3g01480	arylsulfotransferase	1.28956	1.75473	0.453319	1.03483	1.71416	-0.730441
BGC 8		Fusarine C
sidJ	Afu3g03390	siderophore biosynthesis lipase/esterase	-2.17162	-2.01689	-3.30969	-2.92237	0.0743874	0.934369
sidF	Afu3g03400	siderophore biosynthesis acetylase AceI	1.51519	1.96646	-1.50326	-0.815346	0.166161	0.205218
sidH	Afu3g03410	enoyl CoA hydratase	0.870475	1.09039	-1.79617	-1.42624	0.0980009	0.644645
sidD	Afu3g03420	nonribosomal peptide synthase SidD	-0.219903	0.434871	-2.60138	-2.10548	0.169759	0.198838
sitT	Afu3g03430	ATP-binding cassette transporter ABC3	-1.46062	-0.787989	-3.13006	-2.51083	-0.173389	0.560471
mirD	Afu3g03440	siderophore transporter	0.292775	0.592551	-1.16977	-0.621304	0.193986	0.500886
BGC 9		Hexadehydroastechrome (HAS)
hasA	Afu3g12890	fungal Zn(2)-Cys(6) binuclear cluster domain protein	-0.0853293	0.803547	0.548698	0.35511	3.7585	-0.3716
hasB	Afu3g12900	monocarboxylate transporter-like protein, putative	-0.3913	2.21305	0.575645	-0.134599	7.40106	-0.0187681
hasC	Afu3g12910	MmcR, putative	1.03901	3.47286	2.45243	-0.883912	8.95278	-0.55322
hasD	Afu3g12920	NRPS	1.89611	3.90785	2.15283	0.136918	8.92522	-0.691607
hasE	Afu3g12930	dimethylallyl tryptophan synthase-related	0.702956	1.66284	1.13398	-0.894287	7.09284	0.160592
hasF	Afu3g12940	fungal Zn(2)-Cys(6) binuclear cluster domain protein	-0.219844	0.137477	-0.0158294	0.183253	0.967065	1.02373
hasG	Afu3g12950	FAD binding domain protein	-0.857404	2.29039	2.7662	-1.24155	8.29473	0.756857
hasH	Afu3g12960	cytochrome P450 superfamily	0.581335	1.20103	1.90488	0.874034	6.43781	0.14031
BGC 10		Uncharacterized non-ribosomal peptide
	Afu3g13600	C6 transcription factor	-0.470739	-0.599179	-0.353175	-0.279509	0.351987	0.167718
	Afu3g13610	oxidoreductase, zinc-binding, putative	-1.3401	-1.50898	1.14816	-0.964508	-2.1094	-0.391173
	Afu3g13620	cupin domain	0.0362183	0.433704	1.27416	0.118425	1.92834	-0.958935
	Afu3g13630	conserved hypothetical protein	0.44027	1.26215	0.740575	-0.135924	0.556105	-0.0309492
	Afu3g13640	extracellular serine-rich protein	-4.6293	-2.32409	-0.244841	1.41651	-3.9592	0.389873
	Afu3g13650	heme-binding cytochrome domain of fungal cellobiose dehydrogenases, Eukaryotic cytochrome b	-1.02591	-0.456198	2.21415	2.28247	0.449507	-0.456565
	Afu3g13660	Ctr copper transporter family superfamily	0.440267	0.300375	-0.221197	0.825843	0.556103	-0.33944
	Afu3g13670	siderochrome-iron transporter	-0.409064	-0.261158	0.00705391	0.0756178	0.908701	-0.378928
	Afu3g13680	alcohol acetyltransferase	0.440192	0.300299	-0.221272	0.825767	0.556027	1.04041
	Afu3g13690	pyoverdine/dityrosine biosynthesis family	1.40209	0.300416	0.650888	0.845969	0.556147	0
	Afu3g13700	transferase family NRPS-like	-0.546405	0.405942	0.831816	0.517678	-0.14531	-0.37915
	Afu3g13710	GTP cyclohydrolase I precursor	-0.0775738	0.37304	1.65089	1.09898	-2.78066	-0.378956
	Afu3g13720	probable oxidoreductase PA0147 , putative	1.13497	1.55198	1.4563	0.870298	0.507781	-0.134992
	Afu3g13730	NRPS	1.03006	4.44916	-0.634252	-1.73805	2.36924	2.51871
BGC 11		Uncharacterized polyketide
	Afu3g14690	8-amino-7-oxononanoate synthase	-0.120046	1.5378	-0.221119	1.75838	4.40183	-0.441998
	Afu3g14700	polyketide synthase	0.667271	1.6613	1.39539	1.42683	1.85704	-0.378955
	Afu3g14710	phytanoyl-CoA dioxygenase , Fum gene	-0.254731	0.99505	-0.234138	-0.365363	4.54957	-0.302598
	Afu3g14720	MFS transporter	-1.24638	-0.439324	-0.801528	-1.13155	-0.044305	-0.156293
	Afu3g14730	LysR family regulatory protein, fungi	-0.892	-0.313198	-0.891368	-0.412718	0.109219	-0.000299816
	Afu3g14740	hypothetical protein	-1.27278	-0.113773	-0.8161	-1.0833	-0.772372	-0.0268226
	Afu3g14750	fungal transcription factor regulatory middle homology region	-0.474292	1.92925	-0.951122	-0.290094	1.75059	-0.172744
	Afu3g14760	Fum15p, cytochrome P450 monooxygenase	0.466308	2.28022	1.50563	1.13485	-0.34104	-0.200644
	Afu3g14770	Rossmann-fold NAD(P)(+)-binding proteins	1.49399	0.752949	1.40699	0.902358	0.366287	0.847749
BGC 12		Uncharacterized non-ribosomal peptide
	Afu3g15250	MFS drug efflux transporter, putative	0.462531	0.629037	0.103652	0.465778	1.63888	0.777557
	Afu3g15260	hypothetical protein	0.440349	1.26223	-0.221115	-0.135845	0.556185	-0.293261
	Afu3g15270	NRPS	-0.521244	1.15339	0.740587	0.825859	-0.405406	0.65101
	Afu3g15280	putative methyltransferase	-0.521228	0.300668	-0.22114	0.825924	2.12156	-0.571642
	Afu3g15290	C6 transcription factor	0.440564	-0.661125	1.61883	0.825936	1.49752	0.436972
	Afu3g15300	amine transporter	0.0802873	0.866922	0.160215	1.1559	1.32275	1.04116
BGC 13		Endocrocin
encA	Afu4g00210	polyketide synthase	1.46089	6.81002	0.317293	0.569503	6.33712	1.07097
encB	Afu4g00220	metallo-beta-lactamase	0.440457	7.35656	-1.19047	-1.1052	5.64782	0.818943
encC	Afu4g00225	putative monooxygenase	-0.740742	4.48166	0.0216831	1.65387	4.16881	0.035329
encD	Afu4g00230	oxidoreductase, 2OG-Fe(II) oxygenase family	0.805989	5.9511	1.24811	0.66607	5.96578	-0.378928
BGC 14		Trypacidin
tpcM	Afu4g14460	O methyltransferase	-0.521146	-0.661038	-0.221223	1.73083	-0.40531	1.53115
tpcK	Afu4g14470	dehydratase	0.987071	1.78939	2.03703	1.65136	0.528148	1.26103
tpcL	Afu4g14480	putative emodin anthrone oxygenase	0.440321	0.300429	-0.221143	-0.135872	1.51564	-1.34071
tpcJ	Afu4g14490	oxidase/laccase	1.81977	2.36991	1.45754	1.43899	0.486702	-0.378998
tpcI	Afu4g14500	Questin oxygenase	0.44056	0.300664	1.25206	-0.135813	1.68983	0.119784
tpcH	Afu4g14510	methyltransferase	-2.423	1.44018	-0.221112	0.754863	2.89436	0.128346
tpcG	Afu4g14520	Rossmann-fold NAD(P)(+)-binding proteins	0.440503	2.75207	0.740654	-0.135866	3.28504	-0.234795
tpcF	Afu4g14530	theta class glutathione S-transferase	-1.44714	1.91932	1.55426	1.59432	1.92813	-0.0334925
tpcE	Afu4g14540	C6 transcription factor	0.841034	1.91284	1.98114	1.21185	-0.139909	2.48704
tpcD	Afu4g14550	O-methyltransferase family protein like AflS	0.579949	0.783544	1.8216	1.54054	-0.942271	0.928814
tpcC	Afu4g14560	polyketide synthase, putative	0.962907	1.03734	1.33397	1.1284	-0.220919	0.737025
tpcB	Afu4g14570	metallo-beta-lactamase	-0.521226	1.15884	-0.110065	-0.935624	0.554733	-0.0709513
tpcA	Afu4g14580	O-methyltransferase	2.81836	1.89503	2.24106	0.825839	0.556205	-0.484636
BGC 15		Protostadienol, helvolic acid
osc3	Afu4g14770	oxidosqualene:protostadienol cyclase	-1.52235	2.36625	2.92341	3.38586	1.62243	-0.356466
cyp5081A1	Afu4g14780	putative P450 monooxygenase	-1.37746	2.25287	2.39175	2.95714	1.72094	1.84103
cyp5081B1	Afu4g14790	putative P450 monooxygenase	-1.12412	3.01449	1.66976	2.40444	1.54934	0.600995
sdr1	Afu4g14800	acetoin(diacetyl)reductase, short chain dehydrogenase	-3.26197	1.90603	2.72084	2.61577	1.14654	-0.0610284
cyp5081D1	Afu4g14810	putative P450 monooxygenase	-2.21285	2.59786	1.81302	2.58625	2.17347	-1.34031
	Afu4g14820	transferase family superfamily	-1.89895	2.84367	1.93253	1.95333	2.02708	0.582861
cyp081C1	Afu4g14830	putative P450 monooxygenase	-1.86908	2.8244	1.52191	1.80538	1.98687	0.418076
	Afu4g14840	transferase family superfamily	-2.99839	2.90418	1.20424	1.94774	1.96358	-0.0221913
	Afu4g14850	3-ketosteroid-delta-1-dehydrogenase	-1.23905	1.23824	0.316287	0.670198	0.895932	0.0665107
BGC 16		Uncharacterized non-ribosomal peptide-like
	Afu5g10120	NRPS-like	-0.17396	0.362434	-0.0632784	0.147437	0.382035	0.203827
	Afu5g10130	bZIP transcription factor	0.44054	-0.661143	2.2406	-0.135912	1.16535	0.0468118
	Afu5g10140	MSF transporter	-0.946489	-1.29991	-0.763899	-0.462074	-1.36499	-0.290849
	Afu5g10150	hypothetical protein	0.447984	1.57939	-0.517766	0.564131	1.09318	-0.582624
	Afu5g10160	NmrA-like family protein	-0.0777853	0.254547	0.676364	2.07891	0.570452	-0.244295
	Afu5g10170	pectin lyase, hydrolase activity	3.53344	3.66108	2.10454	1.82099	-0.269942	-0.0438549
	Afu5g10180	monooxygenase, salicylate hydroxylase	1.00663	1.82186	2.76546	2.51178	0.964305	0.0887775
	Afu5g10190	hypothetical protein	-0.209884	-0.0607219	-0.0334156	-0.149823	0.796351	-0.190838
	Afu5g10200	hypothetical protein	1.35407	1.52053	1.23835	1.1344	3.81524	0.194015
	Afu5g10210	hypothetical protein	0.475685	0.593583	1.54979	1.23139	3.25362	-0.497839
	Afu5g10220	dehydrogenase	0.780933	1.49466	2.78087	0.00671476	6.16522	0.504263
BGC 17		Uncharacterized non-ribosomal peptide
	Afu5g12700	hypothetical protein, Afu5g12710 has Tetratricopeptide repeat domain and SET domain	-0.0629995	0.908109	1.05806	0.35882	1.46683	0.0476766
	Afu5g12710	SET domain protein	0.890486	1.93041	0.637379	0.510622	0.413735	0.125684
	Afu5g12720	ABC multidrug transporter	0.00756591	0.651623	0.0298559	0.194645	0.810086	-0.336704
	Afu5g12730	NRPS	0.671926	1.06887	-0.399053	-0.480915	0.820536	-0.179059
	Afu5g12740	MFS multidrug transporter	-0.415847	-0.010078	0.150615	-0.172447	0.735036	0.0152334
	Afu5g12750	hypothetical protein	-0.623433	-0.927795	-1.45947	0.344457	-1.89611	-0.490414
	Afu5g12760	zinc finger C-x8-C-x5-C-x3-H type	0.223667	0.951621	0.309873	0.974441	-0.308169	-0.77312
	Afu5g12770	metallo-beta-lactamase, 12780 Galactose oxidase	-0.66316	-0.685752	-0.625614	-0.222903	0.165158	-0.0585003
	Afu5g12780	hypothetical protein	-0.335392	0.195247	0.295308	0.422998	-1.16135	-0.0285419
	Afu5g12790	mitochondrial 3-hydroxyisobutyryl-CoA hydrolase	-0.177608	-0.220725	-0.233343	-0.154726	-0.0782457	-0.149083
BGC 18		Fumisoquin
fsqA	Afu6g03430	fungal Zn(2)-Cys(6) binuclear cluster domain protein	1.73176	1.73253	1.89375	1.76708	2.86817	1.17838
fsqB	Afu6g03440	fructosyl amino acid oxidase	-0.141872	0.809227	0.299159	-0.631576	2.38482	0.251197
fsqC	Afu6g03450	N methyltransferase	0.686935	1.96762	1.30914	-0.101007	2.95306	-0.625665
fsqD	Afu6g03460	hypothetical protein	-0.416726	0.0889969	-0.584225	-0.20715	1.91675	-0.379016
fsqE	Afu6g03470	ATP-binding cassette transporter ABC4	-0.319884	-0.0836392	-0.598757	-0.355205	0.994399	-0.236432
fsqF	Afu6g03480	NRPS-like, putative	0.735325	1.3796	1.84869	1.27559	1.38319	-0.368259
fsqG	Afu6g03490	2-phenol monooxygenase	0.882328	2.5334	1.57059	-0.395495	3.53144	-0.0949129
BGC 19		Uncharacterized non-ribosomal peptide
	Afu6g09580	C6 finger domain protein	-0.825988	-0.59703	0.156253	0.0529054	0.261452	0.718823
	Afu6g09590	alcohol dehydrogenase, zinc-containing, putative	-0.34408	0.113134	0.29145	-0.197299	0.726181	0
	Afu6g09600	zinc metallopeptidase	-1.09544	3.98598	-0.427838	0.222579	3.38752	-0.378928
	Afu6g09610	NRPS	0.440482	3.30425	1.6403	2.68385	1.51638	-2.1485
	Afu6g09620	condensation reaction to form peptide bonds in non- ribosomal peptide biosynthesis	0.440267	0.300374	-0.220814	-1.09731	0.556102	0.174506
BGC 20		Gliotoxin
gliZ	Afu6g09630	fungal Zn(2)-Cys(6) binuclear cluster domain protein	-1.14079	-0.508711	-0.454194	-0.97152	-0.130085	-1.17208
gliI	Afu6g09640	aminotransferase, classes I and II family	0.440509	2.03511	2.68623	0.825792	-0.405435	0.582847
gliJ	Afu6g09650	microsomal dipeptidase precursor	-0.833704	0.961869	-0.17308	-0.0906793	0.190932	0.981781
gliP	Afu6g09660	peptide synthetase, putative	0.621319	0.616688	0.382593	1.05508	0.80706	2.26284
gliC	Afu6g09670	Cytochrome P450 superfamily	-0.389805	-0.0678486	0.52291	1.08763	0.321867	-0.0588473
gliM	Afu6g09680	MmcR, putative	-0.521143	1.12935	-0.221221	-0.135951	-0.405308	0
gliG	Afu6g09690	glutathione S-transferase, putative	0.440541	2.13197	-1.18287	0.837425	0.55437	1.30964
gliK	Afu6g09700	hypothetical protein	0.440349	0.300456	-0.221115	0.825924	0.556185	0.293742
gliA	Afu6g09710	DHA14-like major facilitator	-1.61801	0.383612	1.28938	1.2874	2.89599	-0.19492
gliN	Afu6g09720	putative methyltransferase	0.378938	1.0514	2.21723	-0.135859	4.27826	0.301706
gliF	Afu6g09730	cytochrome P450, putative	0.0211607	0.248983	-0.355424	-0.972039	2.82195	-0.0183276
gliT	Afu6g09740	hypothetical protein	-0.57714	-0.540547	-0.801734	-1.25134	2.80406	2.37626
gliH
BGC 21		Fumiquinozalines
fmqF	Afu6g12040	maltose permease, putative	0.497563	0.763453	-0.284938	-0.488699	-0.84485	0.0396558
fmqC	Afu6g12050	NRPS	-1.44292	9.75074	2.07013	2.75784	8.52862	0.503535
fmqB	Afu6g12060	monooxygenase, putative	-0.756121	7.02945	0.236115	1.72006	6.02352	0.0395098
fmqD	Afu6g12070	FAD binding domain protein	2.26078	9.20123	1.2326	0.670201	8.08753	0.341876
fmqA	Afu6g12080	NRPS	-0.134763	1.04392	-0.438605	-0.218691	-0.184824	0.392646
BGC 22		Pyripyropene A
pyr1	Afu6g13920	related to 4-coumarate--CoA ligase, putative, Acyl-CoA synthetases, adenylate-forming enzymes	-4.4955	0.596972	-2.6739	-1.96097	-1.15515	1.32594
pyr2	Afu6g13930	polyketide synthase,reduced	1.10367	2.09053	0.27135	0.572816	1.91904	0.0539647
pyr3	Afu6g13940	cytochrome P450 monooxygenase	-1.82198	3.23864	-3.01433	-3.13556	1.40271	-0.301343
pyr9	Afu6g13945	cytochrome P450 monooxygenase	-3.28672	2.95421	-2.96407	-1.87687	0.719999	0.320853
pyr4	Afu6g13950	hypothetical protein	-3.03165	3.26583	-1.44297	-1.11361	2.52149	-0.245463
pyr5	Afu6g13970	Fad dependent monooxygenase	-0.288604	1.83481	-0.30258	-0.869392	1.42526	0.452035
pyr6	Afu6g13980	4-hydroxybenzoate-octa-prenyl transferase	0.241674	1.52163	0.190569	-1.58649	2.03531	-0.115816
pyr7	Afu6g13990	trichothecene 3-O-acetyltransferase	0.850302	2.30625	-0.205684	-1.42589	-0.186078	-0.229791
pyr8	Afu6g14000	acetyltransferase	1.12202	2.27755	-0.131959	-1.24421	-0.109851	-0.378955
BGC 23		Neosartoricin
nscB	Afu7g00120	β-lactamase thioesterase	0.728051	0.856595	1.35751	-1.45436	4.09677	0.725988
nscR	Afu7g00130	C6 transcription factor	-1.31096	-1.11882	0.853722	0.0367695	-1.25193	0.582756
	Afu7g00140	hypothetical protein
nscC	Afu7g00150	FAD-dependent monooxygenase	-0.0922094	0.042423	1.90184	1.49695	2.32512	2.0693
nscA	Afu7g00160	PKS	0.498513	0.408998	1.55083	-0.286296	4.61655	0.311645
nscD	Afu7g00170	polycyclic prenyltransferase	0.891127	0.282004	1.52638	-0.506831	4.20616	-0.0554261
nscE	Afu7g00180	NAD-dependent epimerase/dehydratase	0.632541	1.26145	2.81242	0.469766	3.96027	0.38475
BGC 24		Fumitremorgin
ftmA	Afu8g00170	NRPS	-0.125587	2.41877	1.30203	0.663966	0.979466	0.748313
ftmC	Afu8g00190	cytochrome p450	-1.33515	1.68982	0.355181	-0.591641	0.847669	0.358158
ftmD	Afu8g00200	methyltransferase	-1.94954	1.51259	-0.298367	-1.60151	-0.880203	0.386471
ftmB	Afu8g00210	dimethylallyl tryptophan synthase, putative	-2.64833	2.38254	-0.900291	-3.21349	1.17735	0.233703
ftmE	Afu8g00220	cytochrome P450	-4.62895	1.08177	-1.02336	-5.27169	0.649762	2.10541
ftmF	Afu8g00230	alpha ketoglutarate dioxygenase	-4.00122	3.99988	-0.202243	-2.71643	2.21534	0.141747
ftmG	Afu8g00240	cytochrome P450 monooxygenase	-2.47504	2.52964	-1.07604	-0.90158	1.97692	0.365192
ftmH	Afu8g00250	dimethylallyl tryptophan synthase-related	-1.84529	3.04483	1.19565	0.67252	2.36376	1.4838
ftmI	Afu8g00260	F box ankrin repeat	-0.874045	-1.10408	-1.30542	-1.02632	-1.39058	0.256375
Super BGC 25		Intertwined Fumagillin and pseurotin
fmaB	Afu8g00370	polyketide synthase	-0.604981	3.24609	3.50131	2.45283	3.2234	-0.376985
fmaC	Afu8g00380	alpha/beta hydrolase	-0.209549	3.87846	2.96461	2.08571	3.84954	0.117167
fmaD	Afu8g00390	O-methyltransferase	-0.969589	3.6257	3.68894	2.38379	4.28736	1.0341
	Afu8g00400	hypothetical protein	-0.317489	3.63539	3.29557	2.37198	4.069	2.44377
fpaII	Afu8g00410	methionine aminopeptidase type II	0.864254	2.31285	1.70547	1.54114	1.60959	0.405515
fapR	Afu8g00420	fungal Zn(2)-Cys(6) binuclear cluster domain protein	1.70541	3.46064	2.66646	2.41321	2.74635	0.885071
	Afu8g00430	hypothetical protein	-0.781698	3.71281	2.91405	2.16886	3.81961	0.753537
psoF	Afu8g00440	cyclohexanone 1,2-monooxygenase	0.602643	1.80182	1.3291	1.05913	1.9015	0.63768
psoG	Afu8g00450	CG13630-PA
fpaI	Afu8g00460	methionine aminopeptidase type I	-0.00894764	0.283618	0.0824625	0.176241	0.267951	-0.215746
fmaE	Afu8g00470	hypothetical protein	-0.140333	1.25941	-0.189431	0.306297	2.17023	-0.0423549
fmaF	Afu8g00480	MmcH, putative	-0.0375879	4.22326	2.8967	2.00613	4.30451	0.697754
	Afu8g00490	polyketide synthase, putative	-0.310704	4.2935	2.75982	1.944	5.01524	-0.237094
	Afu8g00500	propionate--CoA ligase	-0.395443	3.72918	4.0869	3.25012	3.88762	0.7374
fmaG	Afu8g00510	oxidoreductase	-0.594201	4.22344	3.78939	2.49288	4.44186	-0.0739881
fmaA	Afu8g00520	integral membrane protein	-0.2686	4.27085	3.36169	2.15627	4.05579	-1.0283
psoB	Afu8g00530	alpha beta hydrolase	-0.0635877	3.7008	3.90001	2.73287	4.2805	-0.142923
psoA	Afu8g00540	hybrid PKS-NRPS	0.899419	2.59771	1.85069	1.19313	2.74897	-1.28934
psoC	Afu8g00550	methyltransferase	-0.68484	3.96214	3.34026	2.51241	3.99959	-0.160528
psoD	Afu8g00560	related to cytochrome p450 , putative	0.0731257	4.10588	3.53133	2.99409	4.12438	0.129093
	Afu8g00570	hypothetical protein	-1.0948	3.72529	4.09436	3.32989	4.14414	0.971819
psoE	Afu8g00580	similarity to elongation factor 1 gamma subunit	-0.733402	4.10968	3.70928	2.9106	4.45839	0.705575
BGC 26		Uncharacterized pks and terpene hybrid
	Afu8g02350	polyketide synthase	-0.525257	-0.699377	-1.18296	-0.200795	0.334387	0.151435
	Afu8g02360	TRI7, Membrane bound O-acyl transferase	1.40195	0.300289	-0.221282	0.825757	0.556017	-0.292684
	Afu8g02380	monooxygenase similar to austinol protein	0.440183	2.28297	-0.221281	0.825758	1.52221	0.273159
	Afu8g02390	hypothetical	0.440294	0.300402	-0.22117	-0.1359	0.55613	-0.127725
	Afu8g02400	geranylgeranyl pyrophosphate synthetase AtmG	0.440217	0.300325	-0.221247	0.825793	0.556053	0.118473
	Afu8g02410	4-hydroxybenzoate octaprenyltransferase, putative	0.586242	-1.5363	-1.18273	-1.09746	-0.321084	-2.05651
	Afu8g02420	tandem repeat domain of HRI1	0.642257	0.88151	0.608591	0.936786	0.408655	0.49849
	Afu8g02430	dehydrogenase	0.977331	1.01297	1.28359	1.78679	2.18945	-0.27894
	Afu8g02440	c-4 methyl sterol oxidase	-1.09825	-0.716205	-0.833343	-0.425638	0.367682	-1.62412
	Afu8g02450	hypothetical protein	-1.08684	-0.834231	-0.150144	-0.110809	-0.9738	0.0187209
	Afu8g02460	MFS transporter	-0.147071	0.100223	0.0241784	0.396764	0.540864	2.84785
	Afu8g02470	trihydroxytoluene oxygenase	-0.302944	-0.262879	0.520737	0.602293	-0.0428859	-0.119528
